# Supplementary material for: Urinary Fluoride Levels among Canadians with and without Community Water Fluoridation
Source: MDPI journal article supplement (doi:10.3390/ijerph18126203), 2021-06-08
Supplement: s1 [file s1]

Supplemental Table S1.

## Fluoridation status by site in Cycles 3 of the CHMS

| Fluoride added to public water | Site                      | Region           | Rationale for Classification                                                                                                                                                                                                                                                                                                                                                                                                                                                                                                                          |
|--------------------------------|---------------------------|------------------|-------------------------------------------------------------------------------------------------------------------------------------------------------------------------------------------------------------------------------------------------------------------------------------------------------------------------------------------------------------------------------------------------------------------------------------------------------------------------------------------------------------------------------------------------------|
| <b>No</b>                      | East Montreal             | Quebec           | Online sources including a map of water treatment plants in Montreal confirms that the water treatment plant that services East Montreal (Atwater et Des Bailleurs) does not add fluoride.                                                                                                                                                                                                                                                                                                                                                            |
|                                | South Central Laurentians | Quebec           | This site is comprised of a number of regional municipalities likely including Les Laurentides, Argenteuil, Deux-Montagnes, La Rivière-du-Nord, Les Pays-d'en-Haut, Mirabel, Thérèse-De Blainville. Municipal government employees from Deux-Montagnes, Les Pays-d'en-Haut and Mirabel. Municipalities in Thérèse-De Blainville stopped fluoridation in 2002 according to <a href="http://blogues.radio-canada.ca/rive-sud/2013/07/03/buvez-vous-de-leau-fluoree/">http://blogues.radio-canada.ca/rive-sud/2013/07/03/buvez-vous-de-leau-fluoree/</a> |
|                                | Orillia                   | Ontario          | A presentation by the regional health authority confirms that Orillia has never added fluoride ( <a href="http://www.simcoemuskokahealth.org/docs/default-source/topic-oralhealth/cwffactsheetpublic">http://www.simcoemuskokahealth.org/docs/default-source/topic-oralhealth/cwffactsheetpublic</a> )                                                                                                                                                                                                                                                |
|                                | Victoria-Saanich          | British Columbia | The Greater Victoria Drinking Water Quality Annual Reports confirm that fluoride is not added to the drinking water in Greater Victoria.                                                                                                                                                                                                                                                                                                                                                                                                              |
|                                | Vancouver                 | British Columbia | The Metro Vancouver website (drinking water treatment processes page) confirms that fluoride is not added to the water supply ( <a href="http://www.metrovancouver.org/services/water/quality-facilities/facilities-processes/treatment-process/Pages/default.aspx">http://www.metrovancouver.org/services/water/quality-facilities/facilities-processes/treatment-process/Pages/default.aspx</a> )                                                                                                                                                   |
| <b>Yes</b>                     | Oshawa-Whitby             | Ontario          | Annual water treatment reports confirm the addition of fluoride to the municipal drinking water: <a href="https://www.durham.ca/en/living-here/resources/Documents/WaterandSewer/OWAWaterQualityReport2016.pdf">https://www.durham.ca/en/living-here/resources/Documents/WaterandSewer/OWAWaterQualityReport2016.pdf</a>                                                                                                                                                                                                                              |
|                                | North Toronto             | Ontario          | All areas of Toronto add fluoride to their drinking water, as stated by: <a href="https://www.toronto.ca/311/knowledgebase/kb/docs/articles/toronto-water/water-treatment-and-supply/operations-efficiency/fluoridation-of-city-drinking-water-fluoride-levels.html">https://www.toronto.ca/311/knowledgebase/kb/docs/articles/toronto-water/water-treatment-and-supply/operations-efficiency/fluoridation-of-city-drinking-water-fluoride-levels.html</a>                                                                                            |
|                                | Brampton                  | Ontario          | The city of Brampton is part of the region of Peel, which adds fluoride across the region. See: <a href="http://www.peelregion.ca/health/fluoride/">http://www.peelregion.ca/health/fluoride/</a>                                                                                                                                                                                                                                                                                                                                                     |
|                                | Lethbridge                | Alberta          | Lethbridge has added fluoride to the drinking water since 1974. More information is available from: <a href="https://www.lethbridge.ca/living-here/water-wastewater/Documents/Consumer%20Confidence%20Report%202016.pdf">https://www.lethbridge.ca/living-here/water-wastewater/Documents/Consumer%20Confidence%20Report%202016.pdf</a>                                                                                                                                                                                                               |
|                                | Halifax                   | Nova Scotia      | All water treatment plants in Halifax add fluoride to their drinking water supply, as confirmed by: <a href="https://www.halifax.ca/home-property/halifax-water/water-services">https://www.halifax.ca/home-property/halifax-water/water-services</a>                                                                                                                                                                                                                                                                                                 |
| <b>EXCLUDED</b>                |                           |                  |                                                                                                                                                                                                                                                                                                                                                                                                                                                                                                                                                       |
|                                | Southwest Montérégie      | Quebec           | The municipalities contained within this site were unclear and likely contained a mix of both fluoridated and non-fluoridated municipalities. Since postal code data were not available, sites could not be divided into separate areas and the whole site was therefore excluded.                                                                                                                                                                                                                                                                    |
|                                | West Montreal             | Quebec           | Part of the region is supplied by a water treatment plant that adds fluoride, and another part of the region is supplied by a water treatment plant that does not add fluoride. Since postal code data were not available, sites could not be divided into separate areas and the whole site was therefore excluded.                                                                                                                                                                                                                                  |
|                                | Windsor                   | Ontario          | Windsor stopped fluoridation on January 29 2013, which was during the data collection for Cycle 3. About 78% of tap water samples from this site were collected after fluoridation was discontinued.                                                                                                                                                                                                                                                                                                                                                  |

|                                                                  |               |                                                                                                                                                                                                                                                                                                                                                                                                                                                                                                                                                                                                                                                                                                                                                                                                                                                                                                                                                                                                                                                                                                                                                                                                                                                                     |
|------------------------------------------------------------------|---------------|---------------------------------------------------------------------------------------------------------------------------------------------------------------------------------------------------------------------------------------------------------------------------------------------------------------------------------------------------------------------------------------------------------------------------------------------------------------------------------------------------------------------------------------------------------------------------------------------------------------------------------------------------------------------------------------------------------------------------------------------------------------------------------------------------------------------------------------------------------------------------------------------------------------------------------------------------------------------------------------------------------------------------------------------------------------------------------------------------------------------------------------------------------------------------------------------------------------------------------------------------------------------|
| (stopped Jan 29, 2013)<br>Southwest Calgary<br>(stopped in 2011) | Alberta       | Calgary began adding fluoride to the drinking water supply in 1991, and stopped fluoridation in May 2011. For more information see: <a href="http://www.calgary.ca/UEP/Water/Pages/Drinking-water/Fluoride.aspx">http://www.calgary.ca/UEP/Water/Pages/Drinking-water/Fluoride.aspx</a> . Since fluoridation stopped just before Cycle 3 data collection for this site, the tap water fluoride average for this site was almost 3 times higher than for other non-fluoridated sites. Therefore, this site was excluded from analyses using city fluoridation status as a variable.                                                                                                                                                                                                                                                                                                                                                                                                                                                                                                                                                                                                                                                                                  |
| Brantford-Brant County                                           | Ontario       | The City of Brantford Water System adds fluoride to their municipal water, as described in their 2013 Annual Report available from: <a href="http://www.brantford.ca/residents/health/water_quality/waterquality/Pages/MOEAnnualReport.aspx">http://www.brantford.ca/residents/health/water_quality/waterquality/Pages/MOEAnnualReport.aspx</a><br>Brant County, however, is a rural area in which many individuals are on well water. According to their water treatment report from 2013, the level of fluoride in the region ranges from 0.05 mg/L to 0.25mg/L:<br><a href="https://www.brant.ca/en/invest-in-brant/resources/Area_Studies_Documentation/Northwest-Paris-Area-Study/Azimuth-Final-Brant-Water-Supply-Study-Report-April-2014.pdf">https://www.brant.ca/en/invest-in-brant/resources/Area_Studies_Documentation/Northwest-Paris-Area-Study/Azimuth-Final-Brant-Water-Supply-Study-Report-April-2014.pdf</a><br>The average tap water level for each site in Cycle 3 was calculated, and the average level of fluoride in tap water was 3 times lower for this site than for the average of all fluoridated sites. Any fluoridated site with an average tap water level less than 0.3 mg/L was excluded from classification as a fluoridated site. |
| Kent County                                                      | New Brunswick | The Kent County Water Authority States that they do add fluoride to the water at the range of 0.66 - 1.0 ppm: <a href="https://kentcountywater.org/config/rpts-qual/CCR2012.pdf">https://kentcountywater.org/config/rpts-qual/CCR2012.pdf</a> . The county consists of two towns and three small villages, some of which may receive well water. The average tap water level for each site in Cycle 3 was calculated, and the average level of fluoride in tap water was 3 times lower for this site than for the average of all fluoridated sites. Any fluoridated site with an average tap water level less than 0.3 mg/L was excluded from classification as a fluoridated site.                                                                                                                                                                                                                                                                                                                                                                                                                                                                                                                                                                                 |

---
